# Supplementary material
Source: MDPI journal article supplement (https://www.mdpi.com/1996-1073/14/10/2882)
Supplement: s1 [file s1 › Supplementary S1.pdf]

# A comprehensive study on the recent progress and trends in development of Small Hydropower projects

Teegala Srinivasa Kishore <sup>1</sup>, Epari Ritesh Patro <sup>2,\*</sup>, V.S.K.V. Harish <sup>3</sup> and Ali Torabi Haghighi <sup>2</sup>

<sup>1</sup> Electrical & Electronics Engineering, GMR Institute of Technology, Rajam 532127, India; srinivasakishoret@gmail.com or kishore.ts@gmrit.edu.in

<sup>2</sup> Water, Energy and Environmental Engineering, University of Oulu, 90014 Oulu, Finland; ali.torabihaghighi@oulu.fi

<sup>3</sup> Department of Electrical Engineering, School of Technology, Pandit Deendayal Energy University Gandhinagar, Gujarat 382481, India; vskvharish@ieee.org

\* Correspondence: ritesh.patro@oulu.fi

**Table S1. Global Hydropower and SHP Statistics [1]**

| Sl. No. | Region       | Country      | Hydropower Data          |                          |                                  |                       | Small Hydropower Data    |                         |                |                     |                     |
|---------|--------------|--------------|--------------------------|--------------------------|----------------------------------|-----------------------|--------------------------|-------------------------|----------------|---------------------|---------------------|
|         |              |              | Electrical capacity (MW) | Hydropower capacity (MW) | Hydropower generation (GWh/year) | Hydropower capacity % | Capacity Definition (MW) | Installed Capacity (MW) | Potential (MW) | Installed (<=10 MW) | Potential (<=10 MW) |
| 1       | Central Asia | Kazakhstan   | 21902                    | 2699                     | 10300                            | 12.32                 | 35                       | 200                     | 4800           | 116                 | 2707                |
| 2       | Central Asia | Kyrgyzstan   | 3939                     | 3077                     | 14204                            | 78.12                 | 30                       | 47                      | 409            | 47                  | 275                 |
| 3       | Central Asia | Tajikistan   | 5757                     | 5039                     | 16900                            | 87.53                 | 30                       | N/A                     | N/A            | 27                  | 30000               |
| 4       | Central Asia | Turkmenistan | 5428                     | 1.2                      | N/A                              | 0.02                  | N/A                      | N/A                     | N/A            | 1                   | 1300                |
| 5       | Central Asia | Uzbekistan   | 14142                    | 1879                     | 7930                             | 13.29                 | 30                       | 262                     | 1392           | 76                  | 76                  |
| 6       | Eastern Asia | China        | 1777030                  | 341190                   | 1189840                          | 19.20                 | 50                       | 79300                   | 128000         | 41900               | 63500               |
| 7       | Eastern Asia | DPRK         | 10000                    | 5768                     | 13650                            | 57.68                 | N/A                      | N/A                     | N/A            | 83                  | 83                  |
| 8       | Eastern Asia | Japan        | 300149                   | 50020                    | 84540                            | 16.67                 | 10                       | 3545                    | 10327          | 3545                | 10327               |
| 9       | Eastern Asia | Mongolia     | 1240                     | 28                       | 85                               | 2.26                  | 10                       | 5                       | 27             | 5.22                | 27                  |
| 10      | Eastern Asia | ROK          | 116908                   | 6490                     | 5798                             | 5.55                  | 10                       | 190                     | 1500           | 190                 | 1500                |

|    |                 |             |        |       |        |       |     |      |       |      |       |
|----|-----------------|-------------|--------|-------|--------|-------|-----|------|-------|------|-------|
| 11 | Southern Asia   | Afghanistan | 623    | 308   | 930    | 49.44 | 10  | 76   | 1200  | 76   | 1200  |
| 12 | Southern Asia   | Bangladesh  | 17115  | 230   | 982    | 1.34  | N/A | N/A  | N/A   | 0.06 | 60    |
| 13 | Southern Asia   | Bhutan      | 1622   | 1614  | 7959   | 99.51 | 25  | 32   | 17792 | 8.1  | 8.1   |
| 14 | Southern Asia   | India       | 344002 | 49779 | 135539 | 14.47 | 25  | 4485 | 21134 | N/A  | N/A   |
| 15 | Southern Asia   | Iran        | 74103  | 11278 | 14087  | 15.22 | 10  | 20   | 103   | 20   | 103   |
| 16 | Southern Asia   | Nepal       | 1077   | 1021  | 3635   | 94.80 | 25  | 447  | 4196  | 236  | 1960  |
| 17 | Southern Asia   | Pakistan    | 35372  | 8689  | 28562  | 24.56 | 50  | 410  | 3100  | N/A  | N/A   |
| 18 | Southern Asia   | Sri Lanka   | 4018   | 1726  | 4221   | 42.96 | 10  | 357  | 873   | 357  | 873   |
| 19 | South East Asia | Cambodia    | 1749   | 1028  | 2705   | 58.78 | 10  | 1.7  | 300   | 1.7  | 300   |
| 20 | South East Asia | Indonesia   | 59656  | 5321  | 19888  | 8.92  | 10  | 403  | 12800 | 403  | 12800 |
| 21 | South East Asia | Lao PDR     | 6621   | 4701  | 7367   | 71.00 | 15  | 148  | 2287  | 50   | 50    |
| 22 | South East Asia | Malaysia    | 33764  | 6144  | 20342  | 18.20 | N/A | N/A  | N/A   | 40   | 40    |
| 23 | South East Asia | Myanmar     | 5389   | 3255  | 9744   | 60.40 | N/A | N/A  | N/A   | 36   | 231   |
| 24 | South East Asia | Philippines | 22733  | 3627  | 9611   | 15.95 | 10  | 147  | 2021  | 147  | 2021  |
| 25 | South East Asia | Thailand    | 42209  | 3573  | 4687   | 8.47  | 6   | 172  | 700   | 172  | 700   |
| 26 | South East Asia | Timor-Leste | 301    | 0.35  | N/A    | 0.12  | 50  | 0.35 | N/A   | 0.35 | 220   |
| 27 | South East Asia | Viet Nam    | 41422  | 18004 | 65722  | 43.46 | 30  | 1666 | 7200  | N/A  | N/A   |
| 28 | Western Asia    | Armenia     | 2850   | 1318  | 2269   | 46.25 | 30  | 353  | 422   | 328  | 328   |
| 29 | Western Asia    | Azerbaijan  | 7869   | 1105  | 1959   | 14.04 | 10  | 26   | 520   | 26   | 520   |
| 30 | Western Asia    | Georgia     | 4106   | 3161  | 9813   | 76.98 | 13  | 178  | 336   | 142  | 187   |
| 31 | Western Asia    | Iraq        | 26680  | 1500  | N/A    | 5.62  | N/A | N/A  | N/A   | 6    | 26    |
| 32 | Western Asia    | Israel      | 16682  | 6     | 24     | 0.04  | N/A | N/A  | N/A   | 6    | 6     |
| 33 | Western Asia    | Jordan      | 4609   | 12    | 42     | 0.26  | 10  | 12   | 58    | 12   | 58    |
| 34 | Western Asia    | Lebanon     | 3035   | 282   | 479    | 9.29  | 10  | 31   | 140   | 31   | 140   |

|    |                |                                |       |       |       |       |     |      |       |      |       |
|----|----------------|--------------------------------|-------|-------|-------|-------|-----|------|-------|------|-------|
| 35 | Western Asia   | Saudi Arabia                   | 79070 | 0     | 0     | 0.00  | N/A | N/A  | N/A   | 0    | 130   |
| 36 | Western Asia   | Syrian Arab Republic           | 9122  | 1572  | 413   | 17.23 | 10  | 21   | 21    | 21   | 21    |
| 37 | Western Asia   | Turkey                         | 86931 | 27509 | 58400 | 31.64 | 10  | 2961 | 6500  | 2961 | 6500  |
| 38 | Oceania        | Australia                      | 67000 | 9000  | 15000 | 13.43 | 10  | 173  | 173   | N/A  | N/A   |
| 39 | Oceania        | New Zealand                    | 9291  | 5363  | 24965 | 57.72 | 10  | 154  | 622   | N/A  | N/A   |
| 40 | PICT           | Fiji                           | 316   | 130   | 495   | 41.14 | N/A | 11   | 14    | N/A  | N/A   |
| 41 | PICT           | New Caledonia                  | 959   | 78    | 361   | 8.13  | 10  | 9.9  | 100   | N/A  | N/A   |
| 42 | PICT           | Papua New Guinea               | 581   | 230   | 799   | 39.59 | 10  | 29   | 153   | N/A  | N/A   |
| 43 | PICT           | Solomon Islands                | 31    | 0.3   | N/A   | 0.97  | 10  | 0.3  | 11    | N/A  | N/A   |
| 44 | PICT           | Vanuatu                        | 35    | 1.3   | N/A   | 3.71  | 10  | 1.3  | 6     | N/A  | N/A   |
| 45 | PICT           | Federated States of Micronesia | 35    | 0.7   | N/A   | 2.00  | N/A | 0.7  | 9     | N/A  | N/A   |
| 46 | PICT           | French Polynesia               | 227   | 48    | 176   | 21.15 | 10  | 48   | 98    | N/A  | N/A   |
| 47 | PICT           | Samoa                          | 55    | 12    | 35    | 21.82 | N/A | 14   | 22    | N/A  | N/A   |
| 48 | Eastern Africa | Burundi                        | 74    | 34    | 100   | 45.95 | 1   | 3.1  | 30.5  | 15.8 | 61    |
| 49 | Eastern Africa | Ethiopia                       | 4232  | 3814  | N/A   | 90.12 | 10  | 12.9 | 1500  | 12.9 | 1500  |
| 50 | Eastern Africa | Kenya                          | 2351  | 705   | 3341  | 29.99 | 10  | 39.4 | 3000  | 39.4 | 3000  |
| 51 | Eastern Africa | Madagascar                     | 813   | 163   | N/A   | 20.05 | N/A | N/A  | N/A   | 33   | 82    |
| 52 | Eastern Africa | Malawi                         | 508   | 352   | N/A   | 69.29 | 5   | 5.6  | 150   | 5.6  | 150   |
| 53 | Eastern Africa | Mauritius                      | 826   | N/A   | 90    | N/A   | N/A | N/A  | N/A   | 19.3 | 19.7  |
| 54 | Eastern Africa | Mozambique                     | 2789  | 2134  | 8285  | 76.51 | 25  | 19.4 | N/A   | 3.4  | 1000  |
| 55 | Eastern Africa | Reunion                        | 843   | 133   | 422   | 15.78 | 10  | 11   | 17    | 11   | 17    |
| 56 | Eastern Africa | Rwanda                         | 218   | 98    | N/A   | 44.95 | 5   | 24.8 | 111.1 | 24.8 | 111.1 |
| 57 | Eastern Africa | Somalia                        | 103   | 0     | 0     | 0.00  | N/A | N/A  | N/A   | 0    | 4.6   |

|    |                 |                     |       |      |       |        |     |      |       |      |       |
|----|-----------------|---------------------|-------|------|-------|--------|-----|------|-------|------|-------|
| 58 | Eastern Africa  | South Sudan         | 82    | 0    | 0     | 0.00   | N/A | N/A  | N/A   | 0    | 24.7  |
| 59 | Eastern Africa  | Tanzania            | 1370  | 573  | N/A   | 41.82  | 10  | 30.4 | 480   | 30.4 | 480   |
| 60 | Eastern Africa  | Uganda              | 943   | 712  | 3457  | 75.50  | 20  | 82.8 | 258   | 51.8 | 200   |
| 61 | Eastern Africa  | Zambia              | 2827  | 2566 | 11025 | 90.77  | 20  | 39.7 | 138.7 | 12.9 | 62    |
| 62 | Eastern Africa  | Zimbabwe            | 2215  | 930  | 4989  | 41.99  | 30  | 30.2 | N/A   | 15.2 | 120   |
| 63 | Middle Africa   | Angola              | 3800  | 2365 | 5192  | 62.24  | 10  | 13.1 | 600   | N/A  | N/A   |
| 64 | Middle Africa   | Cameroon            | 1665  | 732  | 4404  | 43.96  | 10  | 1    | 970   | N/A  | N/A   |
| 65 | Middle Africa   | CAR                 | 29    | 29   | 170   | 100.00 | 10  | 28.8 | 41    | N/A  | N/A   |
| 66 | Middle Africa   | Congo               | 610   | 228  | N/A   | 37.38  | N/A | 0    | 65    | N/A  | N/A   |
| 67 | Middle Africa   | DRC                 | 2931  | 2812 | N/A   | 95.94  | 10  | 56   | 101   | N/A  | N/A   |
| 68 | Middle Africa   | Equatorial Guinea   | 390   | 180  | 650   | 46.15  | N/A | 7.5  | 7.5   | N/A  | N/A   |
| 69 | Middle Africa   | Gabon               | 452   | 170  | 821   | 37.61  | N/A | 4.6  | 7.8   | N/A  | N/A   |
| 70 | Middle Africa   | Sao Tome & Principe | 32    | 3    | 6     | 9.38   | 10  | 2.7  | 63.8  | N/A  | N/A   |
| 71 | Northern Africa | Algeria             | 17140 | 269  | 1080  | 1.57   | 10  | 42.1 | 42.1  | 42.1 | 42.1  |
| 72 | Northern Africa | Egypt               | 32015 | 2800 | 13352 | 8.75   | N/A | N/A  | N/A   | 6.8  | 51.7  |
| 73 | Northern Africa | Morocco             | 8253  | 1770 | 1662  | 21.45  | 10  | 38.4 | 306.6 | 38.4 | 306.6 |
| 74 | Northern Africa | Sudan               | 3400  | 1593 | N/A   | 46.85  | 5   | 7.2  | 63.2  | 7.2  | 63.2  |
| 75 | Northern Africa | Tunisia             | 5476  | 62   | 45    | 1.13   | N/A | N/A  | N/A   | 17   | 56    |
| 76 | Southern Africa | Botswana            | 893   | 0    | 0     | 0.00   | N/A | N/A  | N/A   | 0    | 1     |
| 77 | Southern Africa | Eswatini            | 61    | 60   | 119   | 98.36  | N/A | N/A  | N/A   | 8.2  | 16.2  |
| 78 | Southern Africa | Lesotho             | 77    | 76   | N/A   | 98.70  | 10  | 3.8  | 38.2  | 3.8  | 38.2  |
| 79 | Southern Africa | Namibia             | 557   | 347  | 1593  | 62.30  | N/A | N/A  | N/A   | 0.05 | 120   |
| 80 | Southern Africa | South Africa        | 47043 | 2184 | 3717  | 4.64   | 40  | N/A  | N/A   | 38   | 247   |

|     |                |               |       |      |      |       |     |      |       |      |      |
|-----|----------------|---------------|-------|------|------|-------|-----|------|-------|------|------|
| 81  | Western Africa | Benin         | 262   | 0.6  | N/A  | 0.23  | 30  | 0.6  | 304.9 | 0.6  | 69.9 |
| 82  | Western Africa | Burkina Faso  | 315   | 34   | 139  | 10.79 | N/A | N/A  | N/A   | 2.3  | 17   |
| 83  | Western Africa | Cote d'Ivoire | 2199  | 879  | 2047 | 39.97 | 10  | 5    | 45.7  | 5    | 45.7 |
| 84  | Western Africa | Gambia        | 99    | 0    | 0    | 0.00  | 30  | 0    | N/A   | 0    | 12   |
| 85  | Western Africa | Ghana         | 3795  | 1580 | 5561 | 41.63 | 1   | 0    | 12.1  | 0    | 17.4 |
| 86  | Western Africa | Guinea        | 602   | 367  | 428  | 60.96 | N/A | N/A  | N/A   | 10.8 | 198  |
| 87  | Western Africa | Libreria      | 131   | 93   | 0    | 70.99 | 30  | 4.9  | 85.9  | 4.9  | 56.4 |
| 88  | Western Africa | Mali          | 672   | 316  | 1102 | 47.02 | 30  | 5.7  | 61.7  | 5.7  | 28.4 |
| 89  | Western Africa | Mauritania    | 306   | 0    | 229  | 0.00  | N/A | N/A  | N/A   | 0    | N/A  |
| 90  | Western Africa | Niger         | 173   | 0    | 0    | 0.00  | N/A | N/A  | N/A   | 0    | 8    |
| 91  | Western Africa | Nigeria       | 13392 | 2002 | N/A  | 14.95 | 30  | 64.2 | 735   | N/A  | N/A  |
| 92  | Western Africa | Senegal       | 950   | 0    | 332  | 0.00  | 10  | 0    | N/A   | 0    | N/A  |
| 93  | Western Africa | Sierra Leone  | 163   | 56   | N/A  | 34.36 | 30  | 12.9 | 639   | 12.9 | 12.9 |
| 94  | Western Africa | Togo          | 230   | 67   | N/A  | 29.13 | N/A | N/A  | N/A   | 1.6  | 144  |
| 95  | Carribean      | Cuba          | 6407  | 66   | 64   | 1.03  | N/A | 28.9 | 84.9  | N/A  | N/A  |
| 96  | Carribean      | Dominica      | 27    | 7    | 36   | 25.93 | 10  | 4.8  | 4.8   | N/A  | N/A  |
| 97  | Carribean      | DR            | 3460  | 616  | 1510 | 17.80 | 10  | 59.3 | 59.3  | N/A  | N/A  |
| 98  | Carribean      | Grenada       | 51    | 0    | 0    | 0.00  | N/A | 0    | 7     | N/A  | N/A  |
| 99  | Carribean      | Guadeloupe    | 573   | 11   | 34   | 1.92  | 10  | 11.1 | 16.1  | N/A  | N/A  |
| 100 | Carribean      | Haiti         | 349   | 61   | 131  | 17.48 | 10  | 7    | 20.9  | N/A  | N/A  |
| 101 | Carribean      | Jamaica       | 941   | 30   | 157  | 3.19  | 10  | 16.6 | 45.5  | N/A  | N/A  |
| 102 | Carribean      | Puerto Rico   | 6161  | 100  | 51   | 1.62  | 10  | 41.8 | 47.9  | N/A  | N/A  |
| 103 | Carribean      | Saint Lucia   | 91    | 0    | 0    | 0.00  | N/A | 0    | 2.7   | N/A  | N/A  |
| 104 | Carribean      | SV&G          | 58    | 7    | 37   | 12.07 | 10  | 7    | 7.4   | N/A  | N/A  |

|     |                 |               |        |        |        |       |     |       |       |       |       |
|-----|-----------------|---------------|--------|--------|--------|-------|-----|-------|-------|-------|-------|
| 105 | Central America | Belize        | 158    | 55     | 261    | 34.81 | N/A | N/A   | N/A   | 10.3  | 21.7  |
| 106 | Central America | Costa Rica    | 3530   | 2328   | 8677   | 65.95 | N/A | N/A   | N/A   | 125.5 | 125.5 |
| 107 | Central America | El Salvador   | 1846   | 575    | 1339   | 31.15 | 20  | 42    | 158   | 22.6  | 119.8 |
| 108 | Central America | Guatemala     | 4072   | 1438   | 5765   | 35.31 | 5   | 114.3 | 201   | 114.3 | 201   |
| 109 | Central America | Honduras      | 2571   | 676    | 3088   | 26.29 | 30  | 301.8 | N/A   | 128   | 385   |
| 110 | Central America | Mexico        | 55889  | 12125  | 29138  | 21.69 | 30  | 699.3 | N/A   | N/A   | N/A   |
| 111 | Central America | Nicaragua     | 1482   | 143    | 468    | 9.65  | 10  | 18.6  | 85.7  | 18.6  | 85.7  |
| 112 | Central America | Panama        | 3401   | 1777   | 7253   | 52.25 | 20  | 213.5 | 417   | 104.8 | 263.3 |
| 113 | South America   | Argentina     | 38200  | 10118  | 38529  | 26.49 | 50  | 410.2 | N/A   | 97    | 430   |
| 114 | South America   | Bolivia       | 1855   | 483    | 1715   | 26.04 | 5   | N/A   | N/A   | 152.8 | 200   |
| 115 | South America   | Brazil        | 158260 | 101289 | 380900 | 64.00 | 30  | 5670  | 20506 | N/A   | N/A   |
| 116 | South America   | Chile         | 23900  | 6710   | 21786  | 28.08 | 20  | 488   | 10825 | 236   | 2113  |
| 117 | South America   | Columbia      | 17391  | 11834  | 57000  | 68.05 | 10  | 214   | 25000 | 214   | 25000 |
| 118 | South America   | Ecuador       | 7607   | 4418   | 15834  | 58.08 | 10  | 98.2  | 296.6 | 98.2  | 296.6 |
| 119 | South America   | French Guiana | 300    | 119    | 439    | 39.67 | 10  | 6.3   | 6.3   | 6.3   | 6.3   |
| 120 | South America   | Guyana        | 163    | 0      | 0      | 0.00  | 5   | 0     | 24.2  | 0     | 92.1  |
| 121 | South America   | Paraguay      | 8835   | 8810   | 59684  | 99.72 | 50  | 0     | 116.3 | 0     | 86.3  |
| 122 | South America   | Peru          | 14518  | 5189   | 24172  | 35.74 | 20  | 363   | 3500  | N/A   | N/A   |
| 123 | South America   | Suriname      | 501    | 307    | 1356   | 61.28 | N/A | N/A   | N/A   | 1     | 2.7   |
| 124 | South America   | Uruguay       | 4546   | 1538   | 7469   | 33.83 | 50  | 0     | 232   | 0     | 207.8 |

|     |                 |                     |         |        |        |       |     |       |        |       |       |
|-----|-----------------|---------------------|---------|--------|--------|-------|-----|-------|--------|-------|-------|
| 125 | South America   | Venezuela           | 36561   | 16905  | 67633  | 46.24 | N/A | N/A   | N/A    | 0.3   | 48    |
| 126 | North America   | Canada              | 143000  | 80800  | 392647 | 56.50 | 50  | 3400  | 15000  | 1113  | 1113  |
| 127 | North America   | Greenland           | 140     | 9      | 371    | 6.43  | 10  | 8.8   | 183.1  | 8.8   | 183.1 |
| 128 | North America   | USA                 | 1084783 | 101200 | 294000 | 9.33  | N/A | N/A   | N/A    | 3612  | 10583 |
| 129 | Eastern Europe  | Belarus             | 10069   | 95     | 405    | 0.94  | 10  | 18    | 250    | 18    | 250   |
| 130 | Eastern Europe  | Bulgaria            | 12070   | 3204   | 3395   | 26.55 | 1   | N/A   | N/A    | 486   | 580.7 |
| 131 | Eastern Europe  | Czech Republic      | 21989   | 1090   | 2001   | 4.96  | 10  | 337   | 465    | 337   | 465   |
| 132 | Eastern Europe  | Hungary             | 8479    | 57     | 259    | 0.67  | 5   | 16.5  | 55     | 16.5  | 55    |
| 133 | Eastern Europe  | Republic of Moldova | 3001    | 64     | 226    | 2.13  | 10  | 0.4   | 3      | 0.4   | 3     |
| 134 | Eastern Europe  | Poland              | 41396   | 988    | 2399   | 2.39  | N/A | N/A   | N/A    | 294.8 | 1500  |
| 135 | Eastern Europe  | Romania             | 23738   | 6389   | 14300  | 26.91 | 10  | 404   | 730    | 404   | 730   |
| 136 | Eastern Europe  | Russian Federation  | 239812  | 48450  | 178902 | 20.20 | 30  | 826.5 | 825845 | 169.6 | 169.6 |
| 137 | Eastern Europe  | Slovakia            | 7721    | 2539   | 4677   | 32.88 | 10  | 81.6  | 241.4  | 81.6  | 241.4 |
| 138 | Eastern Europe  | Ukraine             | 55330   | 6220   | 9120   | 11.24 | 10  | 95    | 375    | 95    | 375   |
| 139 | Northern Europe | Denmark             | 14247   | 10     | 19     | 0.07  | 10  | 9.8   | 9.8    | 9.8   | 9.8   |
| 140 | Northern Europe | Estonia             | 2885    | 7      | 35     | 0.24  | 10  | 6.5   | 10     | 6.5   | 10    |
| 141 | Northern Europe | Finland             | 17175   | 3159   | 15634  | 18.39 | 10  | 312   | 600    | 312   | 600   |
| 142 | Northern Europe | Iceland             | 2767    | 1984   | 14059  | 71.70 | 10  | 54.8  | 54.8   | 54.8  | 54.8  |
| 143 | Northern Europe | Ireland             | 10459   | 530    | 692    | 5.07  | 5   | N/A   | N/A    | 41    | 60    |
| 144 | Northern Europe | Latvia              | 3095    | 1564   | 4386   | 50.53 | 10  | 28    | 75     | 28    | 75    |

|     |                 |                      |        |       |        |       |    |       |      |       |       |
|-----|-----------------|----------------------|--------|-------|--------|-------|----|-------|------|-------|-------|
| 145 | Northern Europe | Lithuania            | 3665   | 1028  | 1147   | 28.05 | 10 | 26.9  | 51.9 | 26.9  | 51.9  |
| 146 | Northern Europe | Norway               | 33800  | 31837 | 143000 | 94.19 | 10 | 2571  | 7803 | 2571  | 7803  |
| 147 | Northern Europe | Sweden               | 39991  | 16181 | 61700  | 40.46 | 10 | 961   | 961  | 961   | 961   |
| 148 | Northern Europe | Great Britain        | 78300  | 4400  | 8400   | 5.62  | 10 | 390   | 1179 | 390   | 1179  |
| 149 | Southern Europe | Albania              | 2018   | 1920  | 4525   | 95.14 | 15 | 330.2 | N/A  | 240.2 | 1963  |
| 150 | Southern Europe | Bosnia & Herzegovina | 4352   | 2173  | 5843   | 49.93 | 10 | 90    | 1005 | 90    | 1005  |
| 151 | Southern Europe | Croatia              | 4794   | 2175  | 6556   | 45.37 | 10 | 33    | 192  | 33    | 192   |
| 152 | Southern Europe | Greece               | 19624  | 3408  | 3500   | 17.37 | 15 | 232   | 2000 | 232   | 600   |
| 153 | Southern Europe | Italy                | 114161 | 22181 | 43785  | 19.43 | 10 | 3395  | 7073 | 3395  | 7073  |
| 154 | Southern Europe | Montenegro           | 893    | 674   | 1807   | 75.48 | 10 | 25.3  | 97.5 | 25.3  | 97.5  |
| 155 | Southern Europe | Noth Macedonia       | 2057   | 675   | 1879   | 32.81 | 10 | 130   | 260  | 130   | 260   |
| 156 | Southern Europe | Portugal             | 19519  | 6838  | 16909  | 35.03 | 10 | 414   | 750  | 414   | 750   |
| 157 | Southern Europe | Serbia               | 7838   | 2936  | 9477   | 37.46 | 30 | 87.6  | N/A  | 87.6  | 467.2 |
| 158 | Southern Europe | Slovenia             | 3537   | 1271  | 4825   | 35.93 | 10 | 155   | 180  | 155   | 180   |
| 159 | Southern Europe | Spain                | 104121 | 20361 | 20613  | 19.56 | 10 | 2079  | 2158 | 2079  | 2158  |

|     |                |                 |        |       |       |       |    |      |       |      |       |
|-----|----------------|-----------------|--------|-------|-------|-------|----|------|-------|------|-------|
| 160 | Western Europe | Austria         | 21813  | 11990 | 42906 | 54.97 | 10 | 1523 | 1780  | 1523 | 1780  |
| 161 | Western Europe | Belgium         | 21066  | 142   | 2409  | 0.67  | 10 | 72.8 | 103.4 | 72.8 | 103.4 |
| 162 | Western Europe | France          | 130761 | 25517 | 53600 | 19.51 | 10 | 2200 | 2615  | 2200 | 2615  |
| 163 | Western Europe | Germany         | 207932 | 13399 | 28000 | 6.44  | 1  | N/A  | N/A   | 1731 | 1830  |
| 164 | Western Europe | Luxembourg      | 2023   | 1330  | 1530  | 65.74 | 10 | 34   | 44    | 34   | 44    |
| 165 | Western Europe | The Netherlands | 31976  | 38    | 94    | 0.12  | 10 | 3    | 12    | 3    | 12    |
| 166 | Western Europe | Switzerland     | 20842  | 14809 | 36300 | 71.05 | 10 | 950  | 1250  | 950  | 1250  |

(PICT: Pacific Island Countries)

## References

1. Liu, D., Liu, H., Wang, X., Kremere, E. *World Small Hydropower Development Report 2019*; 2019; United Nations Industrial Development Organization; International Center on Small Hydro Power. ([www. smallhydroworld.org](http://www.smallhydroworld.org).)
